# Supplementary material for: Development of a relapse-related RiskScore model to predict the drug sensitivity and prognosis for patients with ovarian cancer
Source: PeerJ. 2025 Aug 11;13:e19764. doi: 10.7717/peerj.19764 (PMC12352420; doi:10.7717/peerj.19764)
Supplement: Supplemental Information 1 [file peerj-13-19764-s001.xls]

## Sheet: Sheet1
ITEM TO CHECK	IMPORTANCE	CHECKLIST
EXPERIMENTAL DESIGN
Definition of experimental and control groups	E	p6line155-157
Number within each group	E	p6line155-157
Assay carried out by core lab or investigator's lab?	D	Not Applicable
Acknowledgement of authors' contributions	D	Not Applicable
SAMPLE
Description	E	p6line168-175
Volume/mass of sample processed	D	Not Applicable
Microdissection or macrodissection	E	p6line168-175
Processing procedure	E	p6line168-175
If frozen - how and how quickly?	E	p6line168-175
If fixed - with what, how quickly?	E	p6line168-175
Sample storage conditions and duration (especially for FFPE samples)	E	p6line168-175
NUCLEIC ACID EXTRACTION
Procedure and/or instrumentation	E	p6line168-175
Name of kit and details of any modifications	E	p6line168-175
Source of additional reagents used	D	Not Applicable
Details of DNase or RNAse treatment	E	p6line168-175
Contamination assessment (DNA or RNA)	E	p6line168-175
Nucleic acid quantification	E	p6line168-175
Instrument and method	E	p6line168-175
Purity (A260/A280)	D	Not Applicable
Yield	D	Not Applicable
RNA integrity method/instrument	E	p6line168-175
RIN/RQI or Cq of 3' and 5' transcripts	E	p6line168-175
Electrophoresis traces	D	Not Applicable
Inhibition testing (Cq dilutions, spike or other)	E	p6line168-175
REVERSE TRANSCRIPTION
Complete reaction conditions	E	p6line168-175
Amount of RNA and reaction volume	E	p6line168-175
Priming oligonucleotide (if using GSP) and concentration	E	p6line168-175
Reverse transcriptase and concentration	E	p6line168-175
Temperature and time	E	p6line168-175
Manufacturer of reagents and catalogue numbers	D	Not Applicable
Cqs with and without RT	D*	Not Applicable
Storage conditions of cDNA	D	Not Applicable
qPCR TARGET INFORMATION
If multiplex, efficiency and LOD of each assay.	E	p6line168-175
Sequence accession number	E	p6line168-175
Location of amplicon	D	Not Applicable
Amplicon length	E	p6line168-175
In silico specificity screen (BLAST, etc)	E	p6line168-175
Pseudogenes, retropseudogenes or other homologs?	D	Not Applicable
Sequence alignment	D	Not Applicable
Secondary structure analysis of amplicon	D	Not Applicable
Location of each primer by exon or intron (if applicable)	E	p6line168-175
What splice variants are targeted?	E	p6line168-175
qPCR OLIGONUCLEOTIDES
Primer sequences	E	p6line168-175
RTPrimerDB Identification Number	D	Not Applicable
Probe sequences	D**	Not Applicable
Location and identity of any modifications	E	p6line168-175
Manufacturer of oligonucleotides	D	Not Applicable
Purification method	D	Not Applicable
qPCR PROTOCOL
Complete reaction conditions	E	p6line168-175
Reaction volume and amount of cDNA/DNA	E	p6line168-175
Primer, (probe), Mg++ and dNTP concentrations	E	p6line168-175
Polymerase identity and concentration	E	p6line168-175
Buffer/kit identity and manufacturer	E	p6line168-175
Exact chemical constitution of the buffer	D	Not Applicable
Additives (SYBR Green I, DMSO, etc.)	E	p6line168-175
Manufacturer of plates/tubes and catalog number	D	Not Applicable
Complete thermocycling parameters	E	p6line168-175
Reaction setup (manual/robotic)	D	Not Applicable
Manufacturer of qPCR instrument	E	p6line168-175
qPCR VALIDATION
Evidence of optimisation (from gradients)	D	Not Applicable
Specificity (gel, sequence, melt, or digest)	E	p6line168-175
For SYBR Green I, Cq of the NTC	E	p6line168-175
Standard curves with slope and y-intercept	E	p6line168-175
PCR efficiency calculated from slope	E	p6line168-175
Confidence interval for PCR efficiency or standard error	D	Not Applicable
r2 of standard curve	E	p6line168-175
Linear dynamic range	E	p6line168-175
Cq variation at lower limit	E	p6line168-175
Confidence intervals throughout range	D	Not Applicable
Evidence for limit of detection	E	p6line168-175
If multiplex, efficiency and LOD of each assay.	E	p6line168-175
DATA ANALYSIS
qPCR analysis program (source, version)	E	p6line168-175
Cq method determination	E	p6line168-175
Outlier identification and disposition	E	p6line168-175
Results of NTCs	E	p6line168-175
Justification of number and choice of reference genes	E	p6line168-175
Description of normalisation method	E	p6line168-175
Number and concordance of biological replicates	D	Not Applicable
Number and stage (RT or qPCR) of technical replicates	E	p6line168-175
Repeatability (intra-assay variation)	E	p6line168-175
Reproducibility (inter-assay variation, %CV)	D	Not Applicable
Power analysis	D	Not Applicable
Statistical methods for result significance	E	p6line168-175
Software (source, version)	E	p6line168-175
Cq or raw data submission using RDML	D	Not Applicable
Table 1. MIQE checklist for authors, reviewers and editors. All essential information (E) must be submitted with the manuscript. Desirable
information (D) should be submitted if available. If using primers obtained from RTPrimerDB, information on qPCR target, oligonucleotides,
protocols and validation is available from that source.
*: Assessing the absence of DNA using a no RT assay is essential when first extracting RNA. Once the sample has been validated as
RDNA-free, inclusion of a no-RT control is desirable, but no longer essential.
**: Disclosure of the probe sequence is highly desirable and strongly encouraged. However, since not all commercial pre-designed assay
vendors provide this information, it cannot be an essential requirement. Use of such assays is advised against.
